# Supplementary material
Source: publisher site journal article supplement (https://www.dovepress.com/article/480644)
Supplement: Supplementary file 1 [file get_supplementary_file.php]

**Quercetin attenuates MRGPRX2-mediated mast cell degranulation via the MyD88/IKK/NF-κB and PI3K/AKT/** **Rac1/Cdc42 pathway**

Chenrui Zhao 1, 2,#, Yuanyuan Ding 2,#, Yihan Huang 2, Chao Wang 2, Bin Guo 1,*, Tao Zhang 2.

*1 Department of Anesthesiology, Xi’an Honghui Hospital, Xi’an Jiaotong University, Xi’an 710054, China*

*2 College of Pharmacy, Xi’an Jiaotong University, Xi’an 710061, China*

*#1 These authors contributed equally.*

** Corresponding author*

*Bin Guo,* *Department of Anesthesiology, Xi’an Honghui Hospital, Xi’an Jiaotong University, Xi’an 710054, China*

*E-mail address:* *xuan_310755@sina.com*

**Supplementary**

**
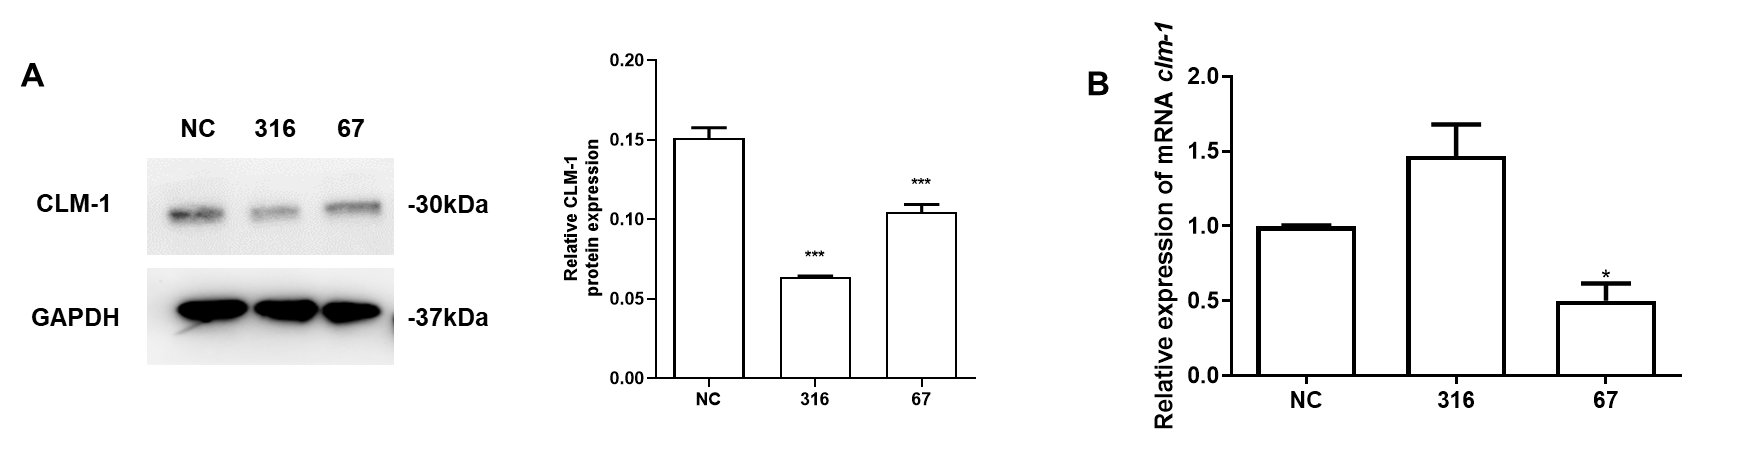
**

Figure S1. CLM-1 down-regulated cells in LAD2 were successfully constructed by siRNA technology.

(A) Western blot was used to analyze the down-regulation efficiency of CLM-1 protein level in LAD2 cells and its gray value quantitative analysis. (B) The down-regulation efficiency of CLM-1 gene expression in LAD2 cells was analyzed by RT-PCR. The data were expressed as mean ± SEM, and the two-tailed unpaired student T test was used for statistical analysis. **P* < 0.05, ****P* < 0.001 were considered statistically significant.
